# Supplementary material
Source: Springer Nature journal article supplement (https://www.springermedizin.de/resource/supplementary/12936_2012_2628_MOESM7_ESM.pdf/9543280)

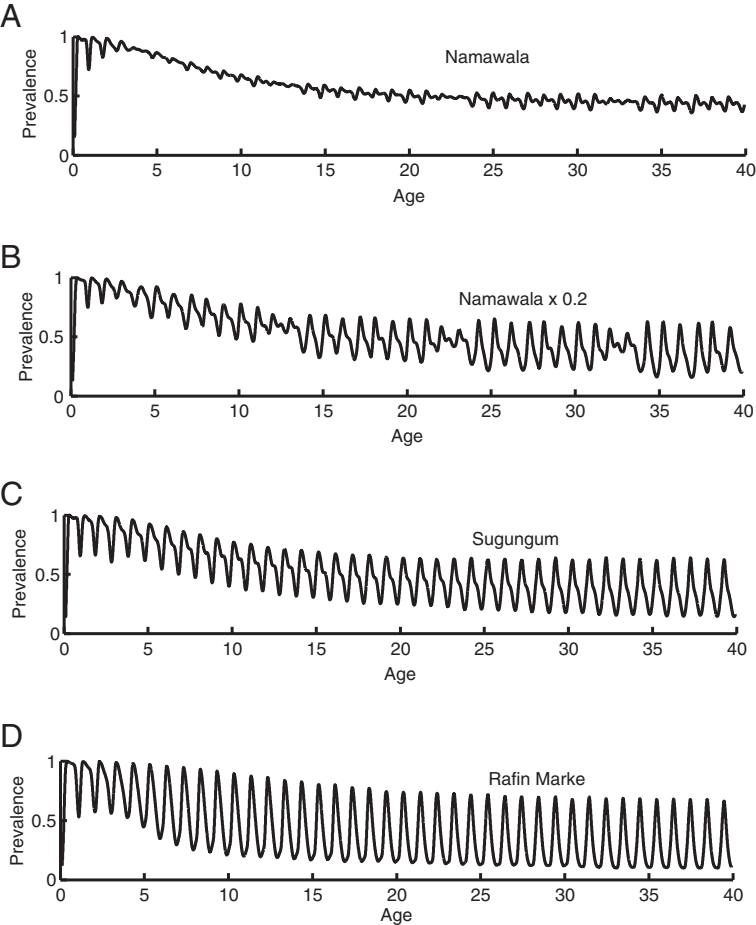

Supplement: MOESM7 [file 9543280]
